# Supplementary material for: Impact of Delta and Vaccination on SARS-CoV-2 transmission risk: Lessons for Emerging Breakthrough infections
Source: bioRxiv or medRxiv preprint supplement (doi:10.1101/2022.03.02.22271385), 2022-03-02
Supplement: Supplementary file [file media-1.pdf]

## SUPPLEMENTARY INFORMATION

### Impact of Delta and Vaccination on SARS-CoV2 transmission risk: Lessons for Emerging Breakthrough infections

Kalpna Sriraman, Ambreen Shaikh, Smriti Vaswani, Tejal Mestry, Grishma Patel, Shalini Sakthivel, Vikas Oswal, Pratibha Kadam, Kayzad Nilgiriwala, Daksha Shah, Mangala Gomare, Nerges Mistry

**Supplementary Table 1** – Comparison of patient clinical parameters, COVID-19 symptom characteristics stratified based on vaccination status

| <b>Descriptions</b>                         | <b>Overall</b>       | <b>Cs-D1</b>        | <b>Cs-D2</b>          | <b>Cx-D2</b>         | <b>Unvaccinated</b> |
|---------------------------------------------|----------------------|---------------------|-----------------------|----------------------|---------------------|
| <b>Clinical parameters</b>                  |                      |                     |                       |                      |                     |
| Lymphocytes (%)<br>(median + IQR)           | 33<br>(26.7-39.1)    | 34<br>(29.5 - 39.5) | 29<br>(17-38)         | 34.5<br>(27.5 - 44)  | 32<br>(26-35)       |
| Platelets (thou/ $\mu$ L)<br>(median + IQR) | 253<br>(187-300)     | 286<br>(232 -314)   | 240<br>(177-288)      | 236<br>(174- 307)    | 271<br>(179-509)    |
| Hemoglobin (g/dL)<br>(median + IQR)         | 13.3<br>(11.7 -14.2) | 13.5<br>(12.5 - 14) | 13.4<br>(11.3 - 15.3) | 13.4<br>(12.2 -14.1) | 12.5<br>(11.6-13.6) |
| CRP (mg\L)<br>(median + IQR)                | 7.8<br>(2.9 - 16)    | 7.75<br>(2.8 - 11)  | 10.2<br>(5.3- 20.3)   | 6.7<br>(2.6-18.1)    | 8.3<br>(1.71-13.1)  |
| LDH (U/L)<br>(median + IQR)                 | 246<br>(173- 295)    | 209<br>(165 - 264)  | 256<br>(168- 280)     | 277<br>(189 -333)    | NA                  |
| <b>Symptoms at Enrolment</b>                |                      |                     |                       |                      |                     |
| Fever                                       | 44                   | 16                  | 11                    | 13                   | 4                   |
| Cough                                       | 55                   | 18                  | 13                    | 17                   | 6                   |
| Sore throat                                 | 25                   | 10                  | 5                     | 7                    | 1                   |
| Loss of Smell/Taste                         | 51                   | 13                  | 14                    | 17                   | 7                   |
| Headache                                    | 15                   | 4                   | 5                     | 3                    | 3                   |
| Body ache/Weakness                          | 27                   | 10                  | 4                     | 9                    | 3                   |
| Chills                                      | 7                    | 1                   | 1                     | 4                    | 1                   |
| Gastric Problems                            | 5                    | 0                   | 2                     | 1                    | 2                   |
| Shortness of Breath                         | 3                    | 0                   | 0                     | 2                    | 1                   |
| Cold                                        | 25                   | 7                   | 10                    | 6                    | 1                   |
| <b>Symptoms at Follow-up</b>                |                      |                     |                       |                      |                     |
| Fever                                       | 2                    | 0                   | 0                     | 2                    | 0                   |
| Cough                                       | 37                   | 12                  | 7                     | 14                   | 4                   |
| Sore throat                                 | 4                    | 0                   | 1                     | 1                    | 2                   |
| Loss of Smell/Taste                         | 37                   | 8                   | 11                    | 15                   | 3                   |
| Headache                                    | 6                    | 1                   | 1                     | 4                    | 0                   |
| Body ache/Weakness                          | 6                    | 1                   | 0                     | 5                    | 0                   |
| Chills                                      | 1                    | 0                   | 0                     | 1                    | 0                   |
| Gastric Problems                            | 6                    | 1                   | 1                     | 4                    | 0                   |
| Shortness of Breath                         | 1                    | 0                   | 0                     | 0                    | 1                   |
| Cold                                        | 12                   | 4                   | 2                     | 5                    | 1                   |
| <b>Types of Comorbidities</b>               |                      |                     |                       |                      |                     |
| Diabetes                                    | 14                   | 0                   | 9                     | 4                    | 1                   |
| Hypertension                                | 9                    | 0                   | 5                     | 2                    | 2                   |
| Cardiovascular Disease                      | 9                    | 0                   | 2                     | 6                    | 1                   |
| Others                                      | 14                   | 4                   | 2                     | 6                    | 2                   |

All values are represented as the number of patients unless specified otherwise. Cs-D1 – One dose of Covishield, Cs-D2 - Two doses of Covishield and Cx-D2 – Two doses of COVAXIN; Ct value – cycle Threshold value; IQR – interquartile range. Cx-D1 group was not included in the analysis due to low patient number (N=2)

**Supplementary Table 2 – Viral strain of the sequenced patient samples**

| <b>SARS-CoV-2 strain</b>  | <b>Number of Patients</b> |
|---------------------------|---------------------------|
| Delta                     | 66                        |
| Delta Derivative (AY.120) | 9                         |

**Supplementary Table 3 – Comparison between Mask High Viral Emitters and Not High Emitters\***

| Descriptions                                                                 | High Emitters (N=37) | Not High Emitters* (N=55) | p-value           | Adjusted p-value (Multivariate Analysis)                                                                                                                                                                                  |       |
|------------------------------------------------------------------------------|----------------------|---------------------------|-------------------|---------------------------------------------------------------------------------------------------------------------------------------------------------------------------------------------------------------------------|-------|
| <b>Age</b> (median + IQR)                                                    | 40<br>(30-50)        | 41<br>(31-50)             | 0.761             | 0.115                                                                                                                                                                                                                     |       |
| <b>Gender</b>                                                                |                      |                           |                   |                                                                                                                                                                                                                           |       |
| Male                                                                         | 23                   | 28                        | 0.392             |                                                                                                                                                                                                                           |       |
| Female                                                                       | 14                   | 27                        |                   |                                                                                                                                                                                                                           |       |
| <b>Vaccine Status</b>                                                        |                      |                           |                   |                                                                                                                                                                                                                           |       |
| Cs-D1                                                                        | 7                    | 19                        | >0.999            | 0.475                                                                                                                                                                                                                     |       |
| Cs-D2                                                                        | 14                   | 14                        | 0.32              | 0.678                                                                                                                                                                                                                     |       |
| Cx-D1                                                                        | 1                    | 1                         | >0.999            | 0.228                                                                                                                                                                                                                     |       |
| Cx-D2                                                                        | 11                   | 13                        | 0.49              | 0.893                                                                                                                                                                                                                     |       |
| Unvaccinated                                                                 | 4                    | 9                         |                   |                                                                                                                                                                                                                           |       |
| <b>Swab Ct Value at Diagnosis</b> (median + IQR)                             | 20<br>(16-24)        | 21<br>(17-25.7)           | 0.305             | 0.091                                                                                                                                                                                                                     |       |
| <b>Swab Viral Load at Recruitment (log Value)</b> (median + IQR)             | 6.5<br>(5.6 – 7.5)   | 4.4<br>(2.7-5.6)          | <b>&lt;0.0001</b> | <b>0.027</b><br>Adjusted for Age, Vaccine status, Number of comorbidities, Swab Ct value at Diagnosis, Cough as a symptom, Day's post symptom onset and effect of days post symptom onset and comorbidities on viral load |       |
| <b>Number of Symptoms</b>                                                    | 4<br>(2-5)           | 3<br>(2-4)                | 0.341             |                                                                                                                                                                                                                           |       |
| <b>Type of Symptoms</b>                                                      |                      |                           |                   |                                                                                                                                                                                                                           |       |
| Fever                                                                        | 17                   | 28                        | 0.675             | 0.334                                                                                                                                                                                                                     |       |
| High                                                                         | 3                    | 4                         | >0.999            |                                                                                                                                                                                                                           |       |
| Mild                                                                         | 15                   | 25                        | 0.673             |                                                                                                                                                                                                                           |       |
| Cough                                                                        | 27                   | 28                        | <b>0.038</b>      |                                                                                                                                                                                                                           |       |
| Sore Throat                                                                  | 12                   | 13                        | 0.473             |                                                                                                                                                                                                                           |       |
| Loss of Smell and Taste                                                      | 16                   | 35                        | 0.058             |                                                                                                                                                                                                                           |       |
| Shortness of Breath                                                          | 2                    | 1                         | 0.562             |                                                                                                                                                                                                                           |       |
| Cold                                                                         | 12                   | 13                        | 0.473             |                                                                                                                                                                                                                           |       |
| <b>Number of comorbidities</b>                                               | 1 (0-1)              | 0                         | <b>0.001</b>      |                                                                                                                                                                                                                           | 0.976 |
| <b>Type of comorbidities</b>                                                 |                      |                           |                   |                                                                                                                                                                                                                           |       |
| Diabetes                                                                     | 9                    | 5                         | 0.073             |                                                                                                                                                                                                                           |       |
| Hypertension                                                                 | 6                    | 4                         | 0.193             |                                                                                                                                                                                                                           |       |
| CVD                                                                          | 4                    | 1                         | 0.153             |                                                                                                                                                                                                                           |       |
| Others                                                                       | 8                    | 6                         | 0.236             |                                                                                                                                                                                                                           |       |
| <b>Duration between last dose of vaccination to infection</b> (median + IQR) | 47<br>(21-87)        | 58<br>(21-77)             | 0.707             |                                                                                                                                                                                                                           |       |
| <b>Antivirals taken</b>                                                      | 23                   | 32                        | 0.829             |                                                                                                                                                                                                                           |       |
| <b>Days post symptom onset</b> (median + IQR)                                | 3<br>(3-4)           | 4<br>(3-5)                | <b>0.023</b>      | 0.566                                                                                                                                                                                                                     |       |
| <b>Sampling score</b> (median + IQR)                                         | 7<br>(6-7.75)        | 6<br>(5-8)                | 0.217             |                                                                                                                                                                                                                           |       |

\*Includes moderate, low, and zero emitters. All values are represented as the number of patients unless specified otherwise. IQR-Interquartile range

**Supplementary Table 4 – Comparison Between Single infection and Multiple infection households**

| <b>Description</b>                                                       | <b>Single infection households (N=22)</b> | <b>Multiple infection households (N=67)</b> | <b>p-value</b> | <b>Adjusted p-value (Multivariate Analysis)</b>                                                                                                                                                                      |       |
|--------------------------------------------------------------------------|-------------------------------------------|---------------------------------------------|----------------|----------------------------------------------------------------------------------------------------------------------------------------------------------------------------------------------------------------------|-------|
| <b>Age</b> (median + IQR)                                                | 39<br>(30-50)                             | 40<br>(31-49)                               | 0.764          | 0.432                                                                                                                                                                                                                |       |
| <b>Gender</b>                                                            |                                           |                                             |                |                                                                                                                                                                                                                      |       |
| Male                                                                     | 10                                        | 39                                          | 0.331          | Adjusted for Age, No of Symptoms, Fever as a symptom, Days between the last dose of vaccination to infection and adjusted for the effect of Days between the last dose of vaccination to infection in CS-D2 patients |       |
| Female                                                                   | 12                                        | 28                                          |                |                                                                                                                                                                                                                      |       |
| <b>Vaccine status</b>                                                    |                                           |                                             |                |                                                                                                                                                                                                                      |       |
| Cs-D1                                                                    | 7                                         | 18                                          | 0.065          |                                                                                                                                                                                                                      |       |
| Cs-D2                                                                    | 2                                         | 26                                          | <b>0.018</b>   |                                                                                                                                                                                                                      |       |
| Cx-D2                                                                    | 6                                         | 17                                          | 0.119          |                                                                                                                                                                                                                      |       |
| Unvaccinated                                                             | 7                                         | 4                                           |                |                                                                                                                                                                                                                      |       |
| <b>Days between last dose of vaccination to infection</b> (median + IQR) | 58<br>(26-77)                             | 63<br>(37-87)                               | <b>0.021</b>   |                                                                                                                                                                                                                      | 0.227 |
| <b>Number of symptoms</b>                                                | 3<br>(1-4)                                | 3<br>(2-5)                                  | 0.236          |                                                                                                                                                                                                                      | 0.401 |
| <b>Types of symptoms</b>                                                 |                                           |                                             |                |                                                                                                                                                                                                                      | 0.259 |
| Fever                                                                    | 9                                         | 36                                          | 0.221          |                                                                                                                                                                                                                      |       |
| Cough                                                                    | 12                                        | 17                                          | 0.67           |                                                                                                                                                                                                                      |       |
| Sore throat                                                              | 6                                         | 37                                          | >0.999         |                                                                                                                                                                                                                      |       |
| Gastric problems                                                         | 11                                        | 4                                           | >0.999         |                                                                                                                                                                                                                      |       |
| Cold                                                                     | 4                                         | 20                                          | 0.408          |                                                                                                                                                                                                                      |       |
| <b>Viral load in mask</b> (Log Value, median + IQR)                      | 2.2<br>(1.6-3.7)                          | 2.8<br>(1.6-4.1)                            | 0.371          | 0.786                                                                                                                                                                                                                |       |
| <b>Viral load in Swab</b> (Log Value, median + IQR)                      | 4.4<br>(2.-6.1)                           | 5.6<br>(4.5-6.6)                            | <b>0.011</b>   |                                                                                                                                                                                                                      |       |
| <b>Ct value at diagnosis</b> (median + IQR)                              | 21<br>(17-24)                             | 20<br>(16.5-24)                             | 0.337          |                                                                                                                                                                                                                      |       |
| <b>Family type</b>                                                       |                                           |                                             |                |                                                                                                                                                                                                                      |       |
| Nuclear                                                                  | 8                                         | 34                                          | 0.326          |                                                                                                                                                                                                                      |       |
| Joint                                                                    | 14                                        | 33                                          |                |                                                                                                                                                                                                                      |       |
| <b>Days post symptom onset</b> (median + IQR)                            | 4<br>(3-5)                                | 4<br>(3-5)                                  | 0.495          |                                                                                                                                                                                                                      |       |
| <b>Antivirals Taken</b>                                                  | 12                                        | 43                                          | 0.455          |                                                                                                                                                                                                                      |       |

Single infection Household – Only study patient infected with SARS-CoV-2, multiple infection Household – Study patient + Household member/s infected with SARS-CoV-2, IQR-Interquartile range

## Supplementary Figure 1

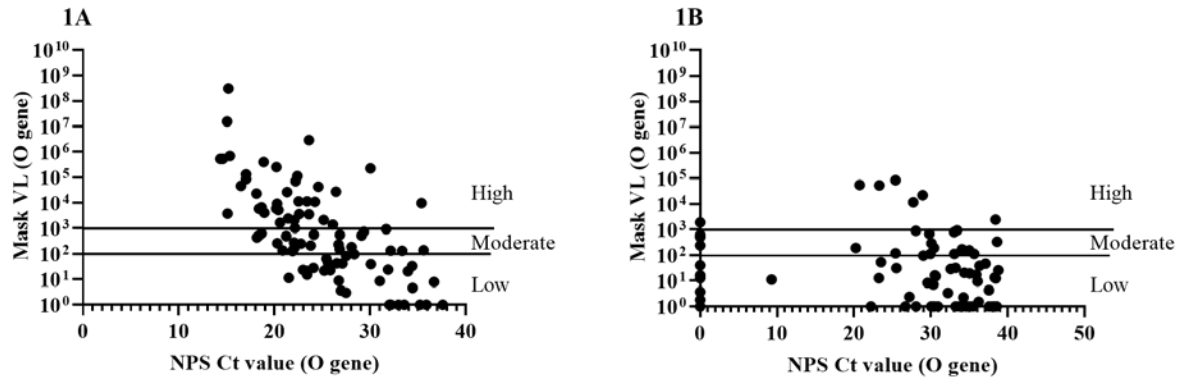

**Supplementary Figure 1:** Scatter plot depicting the NPS Ct value on X-axis and mask viral load on Y-axis **1A**- at Enrolment and **1B** – Follow up

Supplementary Figure 2

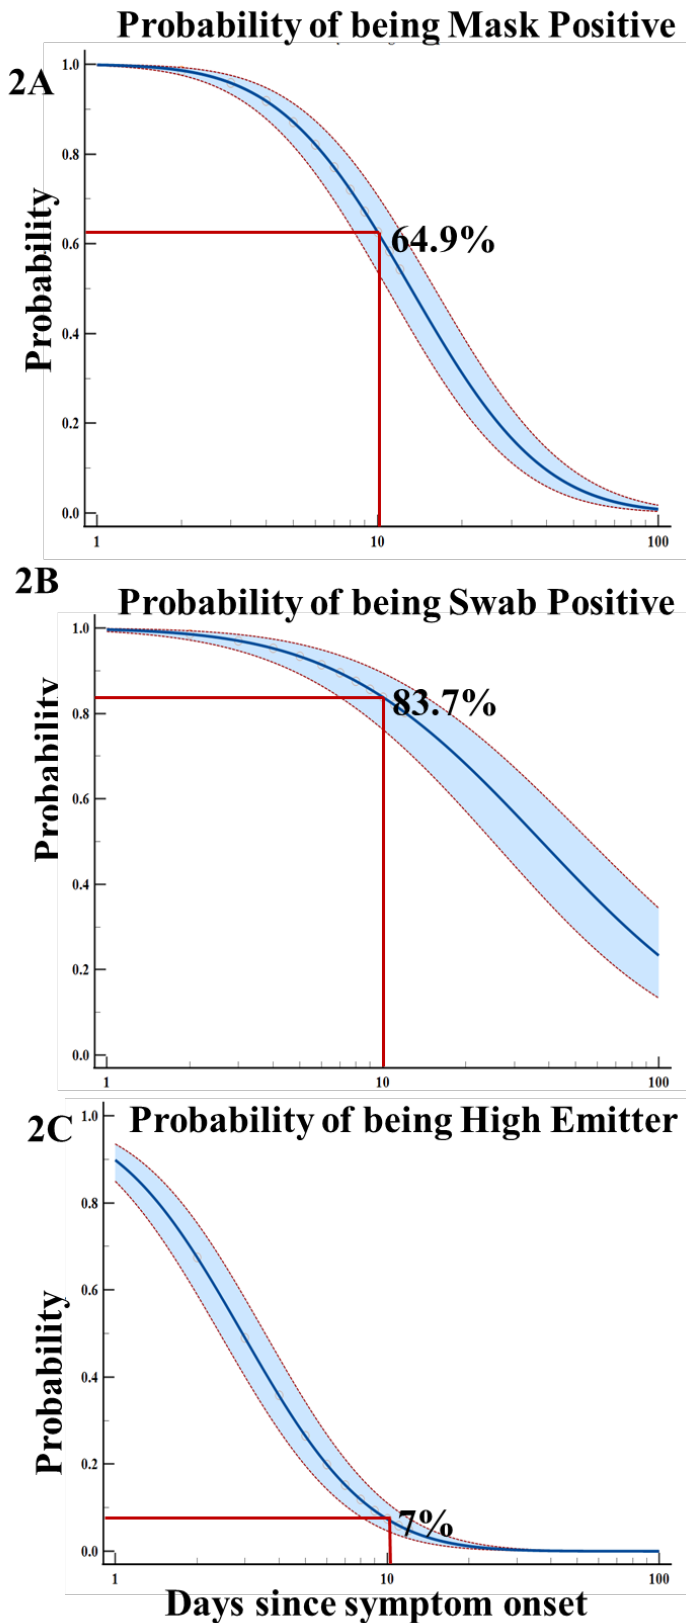

**Supplementary Figure 2 – Probit Analysis** – The graphs describe the probability of being mask positive (2A), swab positive (2B) or a high emitter (2C) on any day after the symptom onset of SARS-CoV-2 infection as calculated by Probit (MedCalc software, 20.019). The red lines highlight the probability of being mask (2A), swab (2B) positive or high emitter (2C) tenth day from symptom onset.
